# Supplementary material for: Prospective development and validation of a liquid immune profile-based signature (LIPS) to predict response of metastatic cancer patients to immune checkpoint inhibitors
Source: bioRxiv or medRxiv preprint supplement (doi:10.1101/2020.08.03.20167163), 2020-10-02
Supplement: Supplementary file [file 2020.08.03.20167163-1.pdf]

**Table 1. Baseline characteristics of metastatic cancer patients treated with ICI and for which immunophenotyping was performed before the second administration of ICI.**

| <b>Features</b>         | <b>Training cohort</b> | <b>Validation cohort</b> | <b>P-value</b> |
|-------------------------|------------------------|--------------------------|----------------|
| <b>Total</b>            | 56                     | 33                       |                |
| <b>Gender</b>           |                        |                          | 0.5571         |
| Male                    | 42 (75%)               | 23 (69.7%)               |                |
| Female                  | 14(25%)                | 10(30.3%)                |                |
| <b>Age</b>              |                        |                          | 0.4133         |
| >=60                    | 16(28.57%)             | 13(39.39%)               |                |
| <60                     | 40(71.43%)             | 20(60.61%)               |                |
| <b>Tumor entity</b>     |                        |                          | 0.8186         |
| HNSCC                   | 24(42.86%)             | 16(48.49%)               |                |
| NSCLC                   | 26(46.42%)             | 13(39.39%)               |                |
| others                  | 6(10.71%)              | 4(12.12%)                |                |
| <b>Brain metastasis</b> |                        |                          | 0.6538         |
| Yes                     | 12(21.43%)             | 5(15.15%)                |                |
| No                      | 44(78.57%)             | 28(84.85%)               |                |
| <b>PD-L1 expression</b> |                        |                          | 0.8995         |
| <1%                     | 19(33.93%)             | 12(36.37%)               |                |
| 1-49%                   | 18(32.14%)             | 10(30.3%)                |                |
| 50%-100%                | 17(30.36%)             | 11(33.33%)               |                |
| NA                      | 2(3.57%)               | 0                        |                |
