# Supplementary material for: Prospective development and validation of a liquid immune profile-based signature (LIPS) to predict response of metastatic cancer patients to immune checkpoint inhibitors
Source: bioRxiv or medRxiv preprint supplement (doi:10.1101/2020.08.03.20167163), 2020-10-02
Supplement: Supplementary file [file 2020.08.03.20167163-2.pdf]

**Table 2. Univariate Cox regression (p<0.2).**

| <b>Characteristics</b>                                 | <b>HR</b> | <b>95% CI</b> | <b>P Value</b> |
|--------------------------------------------------------|-----------|---------------|----------------|
| <b>Monocytes (CD14<sup>high</sup>)</b>                 | 0.28      | 0.16 - 0.47   | 0              |
| <b>Monocytes (CD14<sup>low</sup>)</b>                  | 1.37      | 1.14 - 1.66   | 0.00109        |
| <b>Neutrophils</b>                                     | 1.68      | 1.15 - 2.44   | 0.00682        |
| <b>DCs</b>                                             | 0.69      | 0.47 - 1.03   | 0.06665        |
| <b>mDCs-1</b>                                          | 0.47      | 0.27 - 0.83   | 0.00991        |
| <b>mDCs-2</b>                                          | 0.75      | 0.58 - 0.97   | 0.0258         |
| <b>pDCs</b>                                            | 0.56      | 0.4 - 0.8     | 0.00114        |
| <b>NK cells (CD56<sup>high</sup>/CD16<sup>+</sup>)</b> | 0.84      | 0.64 - 1.09   | 0.19433        |
| <b>NKT cells (CD56<sup>+</sup>/CD16<sup>+</sup>)</b>   | 0.61      | 0.4 - 0.92    | 0.01906        |
| <b>NKT cells (CD16<sup>+</sup>)</b>                    | 0.76      | 0.58 - 1      | 0.0491         |
| <b>CD8+ T cells (PD-1<sup>+</sup>)</b>                 | 1.63      | 1.06 - 2.51   | 0.02604        |
| <b>CD8+ T cells (CD25<sup>+</sup>)</b>                 | 1.2       | 0.93 - 1.56   | 0.1591         |
| <b>CD8+ T cells (CD69<sup>+</sup>)</b>                 | 0.75      | 0.49 - 1.15   | 0.18642        |
| <b>T<sub>regs</sub></b>                                | 0.79      | 0.58 - 1.08   | 0.14495        |
