# Supplementary material for: Prospective development and validation of a liquid immune profile-based signature (LIPS) to predict response of metastatic cancer patients to immune checkpoint inhibitors
Source: bioRxiv or medRxiv preprint supplement (doi:10.1101/2020.08.03.20167163), 2020-10-02
Supplement: Supplementary file [file 2020.08.03.20167163-3.pdf]

**Table 3. Univariate and multivariate Cox regression analysis for overall survival and progression-free survival.**

| Parameter               | Overall Survival          |           |           |                         |           |           | Progression-Free Survival |           |           |                         |           |           |
|-------------------------|---------------------------|-----------|-----------|-------------------------|-----------|-----------|---------------------------|-----------|-----------|-------------------------|-----------|-----------|
|                         | univariate Cox regression |           |           | multivariate regression |           |           | univariate regression     |           |           | multivariate regression |           |           |
|                         | HR                        | 95%CI     | P         | HR                      | 95%CI     | P         | HR                        | 95%CI     | P         | HR                      | 95%CI     | P         |
| <b>FCBPS signature</b>  |                           |           |           |                         |           |           |                           |           |           |                         |           |           |
| High risk               | Ref                       |           |           | Ref                     |           |           | Ref                       |           |           | Ref                     |           |           |
| Low risk                | 0.28                      | 0.15-0.52 | <0.001*** | 0.27                    | 0.12-0.57 | <0.001*** | 0.22                      | 0.12-0.39 | <0.001*** | 0.23                    | 0.10-0.52 | <0.001*** |
| <b>Age</b>              |                           |           |           |                         |           |           |                           |           |           |                         |           |           |
| < 60 yr                 | Ref                       |           |           | Ref                     |           |           | Ref                       |           |           | Ref                     |           |           |
| ≥ 60 yr                 | 1.36                      | 0.77-2.41 | 0.3       | 2.22                    | 1.12-4.41 | 0.023*    | 1.13                      | 0.68-1.86 | 0.6       | 1.56                    | 0.89-2.75 | 0.12      |
| <b>Gender</b>           |                           |           |           |                         |           |           |                           |           |           |                         |           |           |
| Male                    | Ref                       |           |           | Ref                     |           |           | Ref                       |           |           | Ref                     |           |           |
| Female                  | 1                         | 0.54-1.86 | 1         | 1.46                    | 0.68-3.09 | 0.323     | 0.77                      | 0.44-1.34 | 0.4       | 0.98                    | 0.52-1.86 | 0.95      |
| <b>Tumour entity</b>    |                           |           |           |                         |           |           |                           |           |           |                         |           |           |
| Others                  | Ref                       |           |           | Ref                     |           |           | Ref                       |           |           | Ref                     |           |           |
| HNSCC                   | 0.91                      | 0.54-1.55 | 0.7       | 0.54                    | 0.23-1.31 | 0.172     | 1.41                      | 0.88-2.25 | 0.1       | 0.81                    | 0.34-1.88 | 0.618     |
| NSCLC                   | 0.94                      | 0.56-1.59 | 0.8       | 0.6                     | 0.25-1.46 | 0.263     | 0.7                       | 0.44-1.12 | 0.1       | 0.56                    | 0.23-1.38 | 0.208     |
| <b>Brain metastasis</b> |                           |           |           |                         |           |           |                           |           |           |                         |           |           |
| Yes                     | Ref                       |           |           | Ref                     |           |           | Ref                       |           |           | Ref                     |           |           |
| No                      | 0.43                      | 0.24-0.79 | 0.005**   | 0.52                    | 0.25-1.1  | 0.087     | 0.46                      | 0.26-0.80 | 0.005**   | 0.75                    | 0.34-1.66 | 0.481     |
| <b>PD-L1 expression</b> |                           |           |           |                         |           |           |                           |           |           |                         |           |           |
| < 1 % / NA              | Ref                       |           |           | Ref                     |           |           | Ref                       |           |           | Ref                     |           |           |
| 1-49 %                  | 0.69                      | 0.39-1.24 | 0.2       | 0.57                    | 0.30-1.12 | 0.106     | 0.61                      | 0.36-1.02 | 0.06      | 0.51                    | 0.27-0.96 | 0.036*    |
| 50-100 %                | 0.78                      | 0.43-1.41 | 0.4       | 0.44                    | 0.20-0.93 | 0.031*    | 0.89                      | 0.54-1.47 | 0.6       | 0.61                    | 0.31-1.18 | 0.142     |

**Note:** \* p<0.05, \*\* p<0.01, \*\*\*p<0.001
