# Supplementary material for: Prospective development and validation of a liquid immune profile-based signature (LIPS) to predict response of metastatic cancer patients to immune checkpoint inhibitors
Source: bioRxiv or medRxiv preprint supplement (doi:10.1101/2020.08.03.20167163), 2020-10-02

### A. HNSCC OS

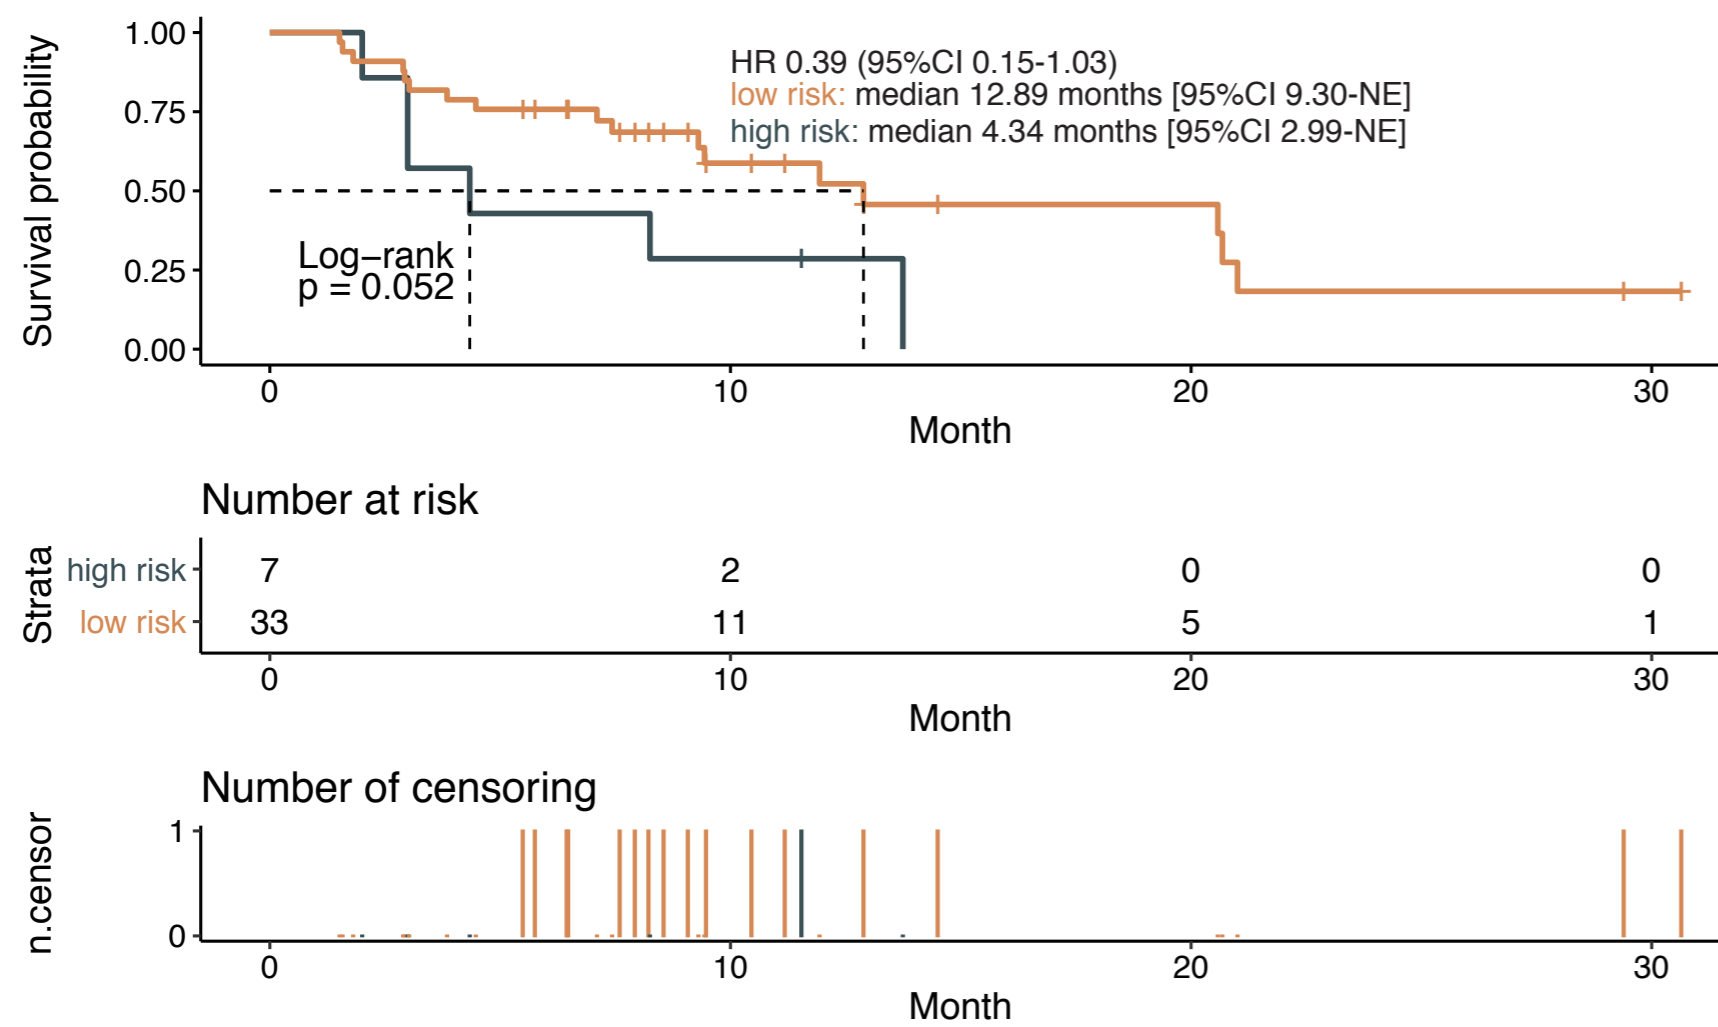

### C. HNSCC PFS

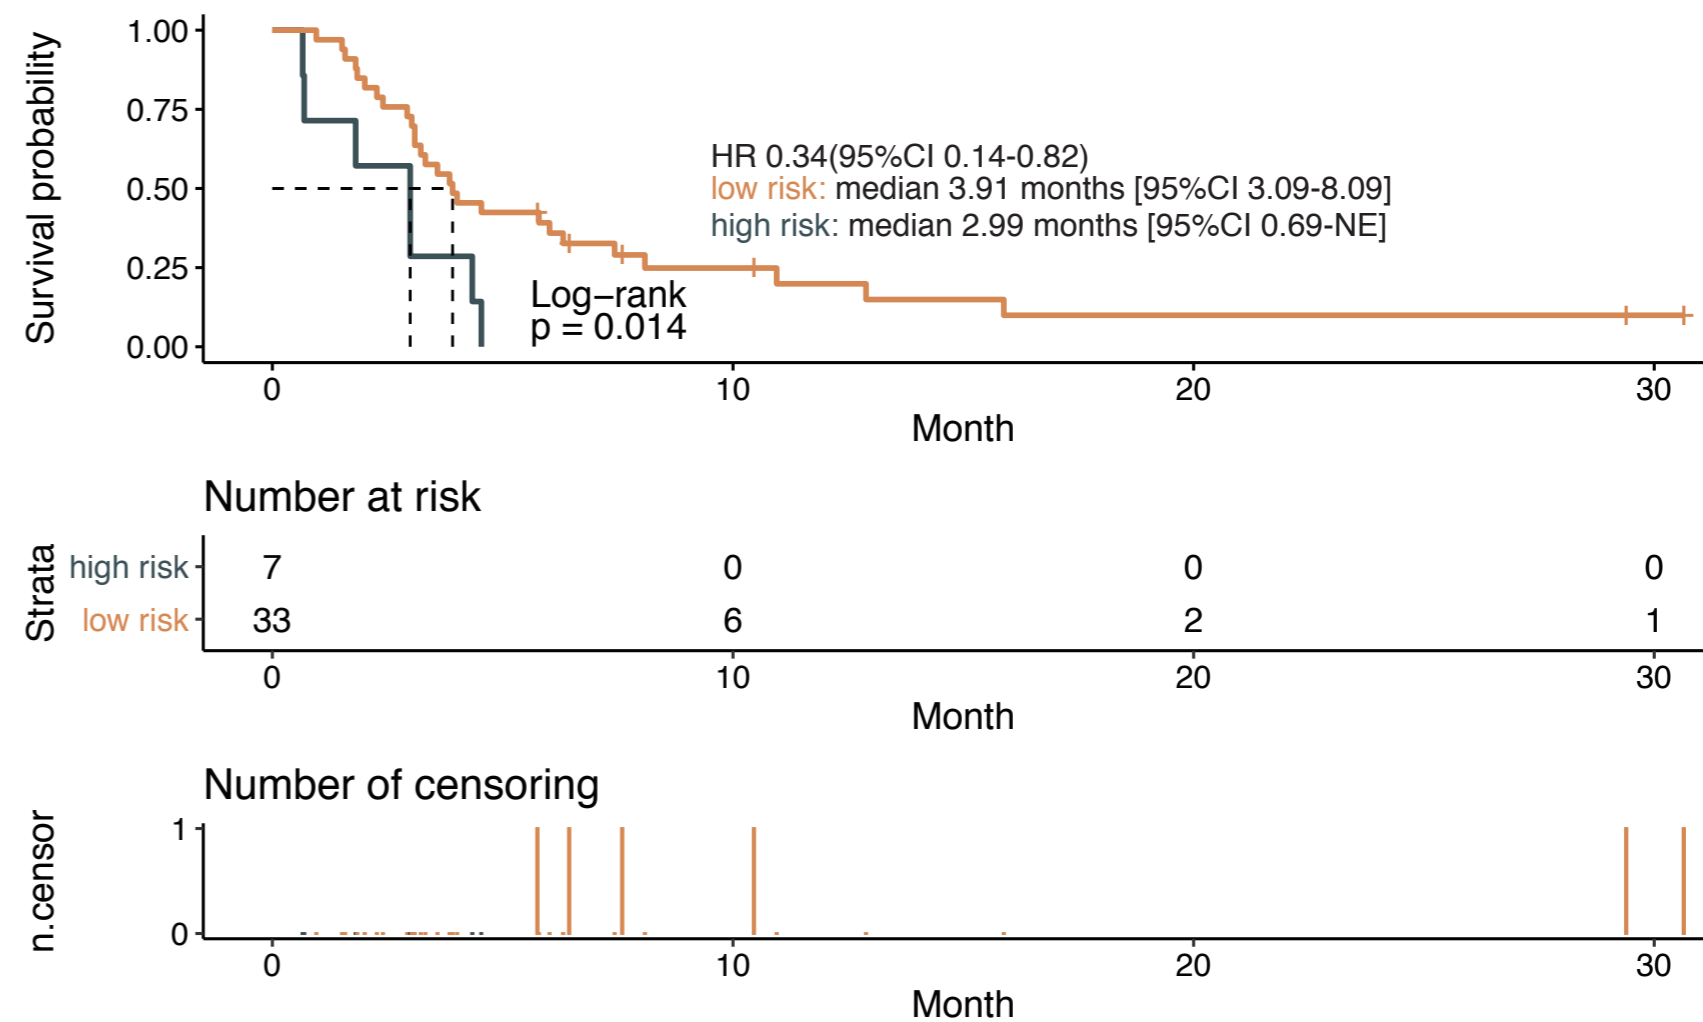

### B. NSCLC OS

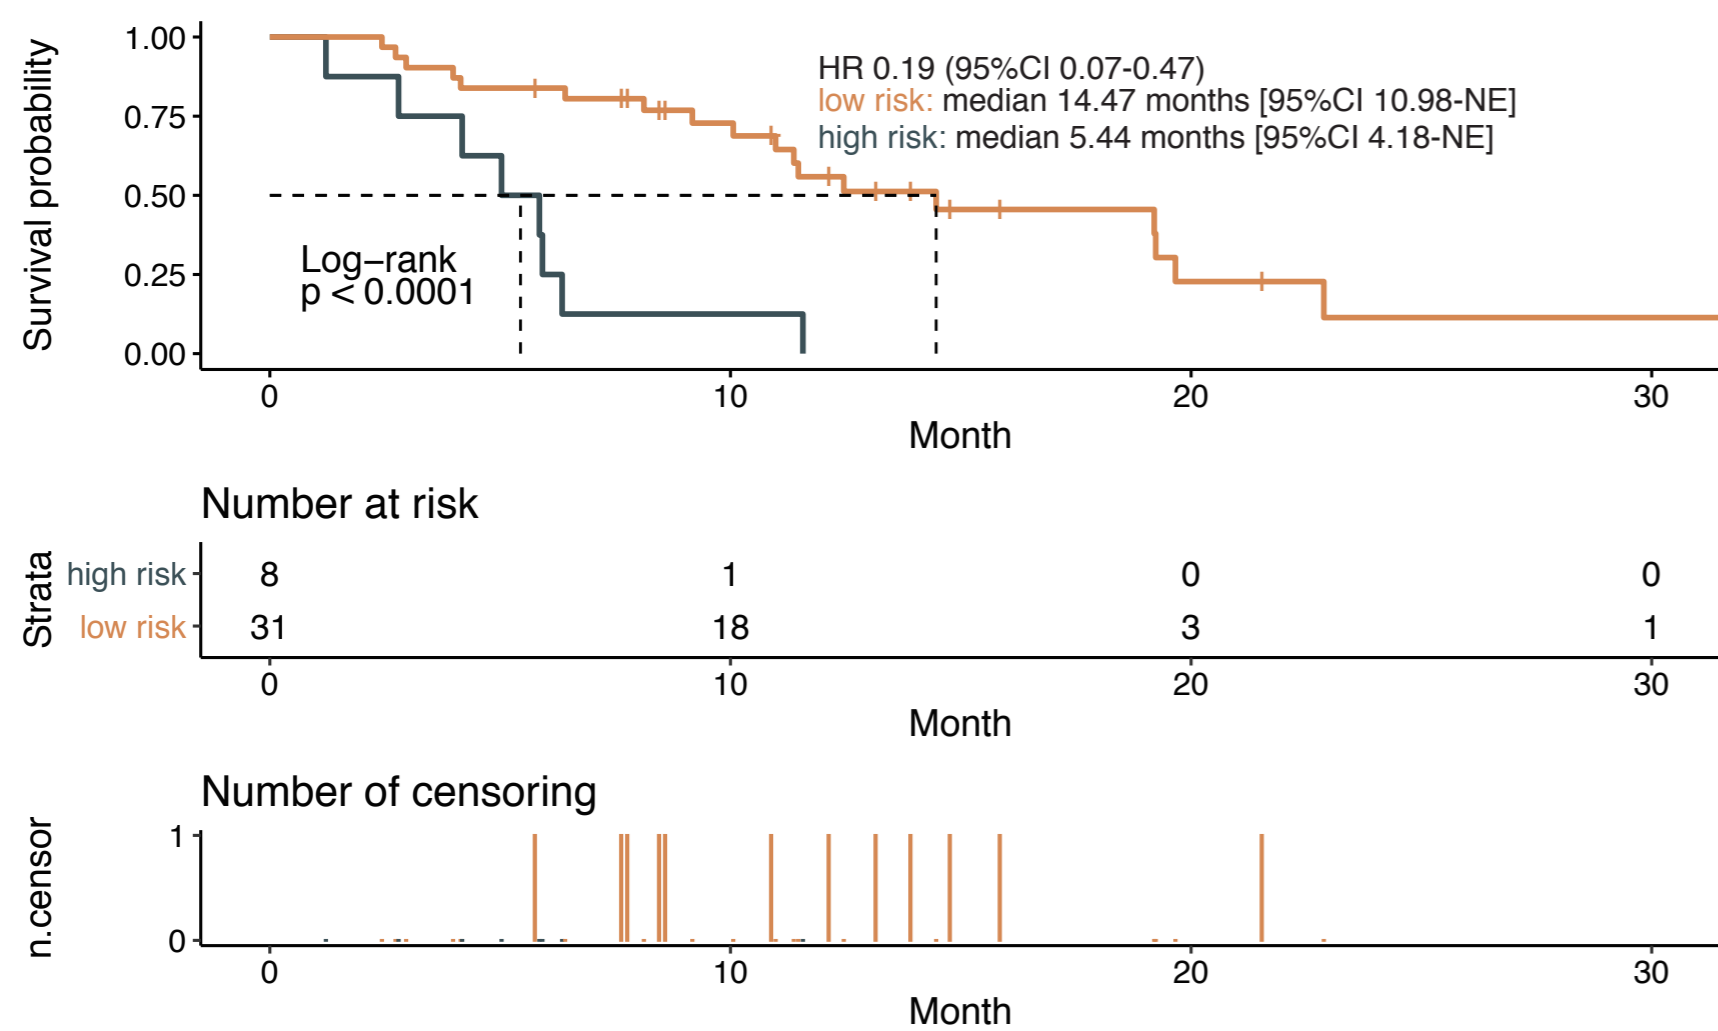

### D. NSCLC PFS

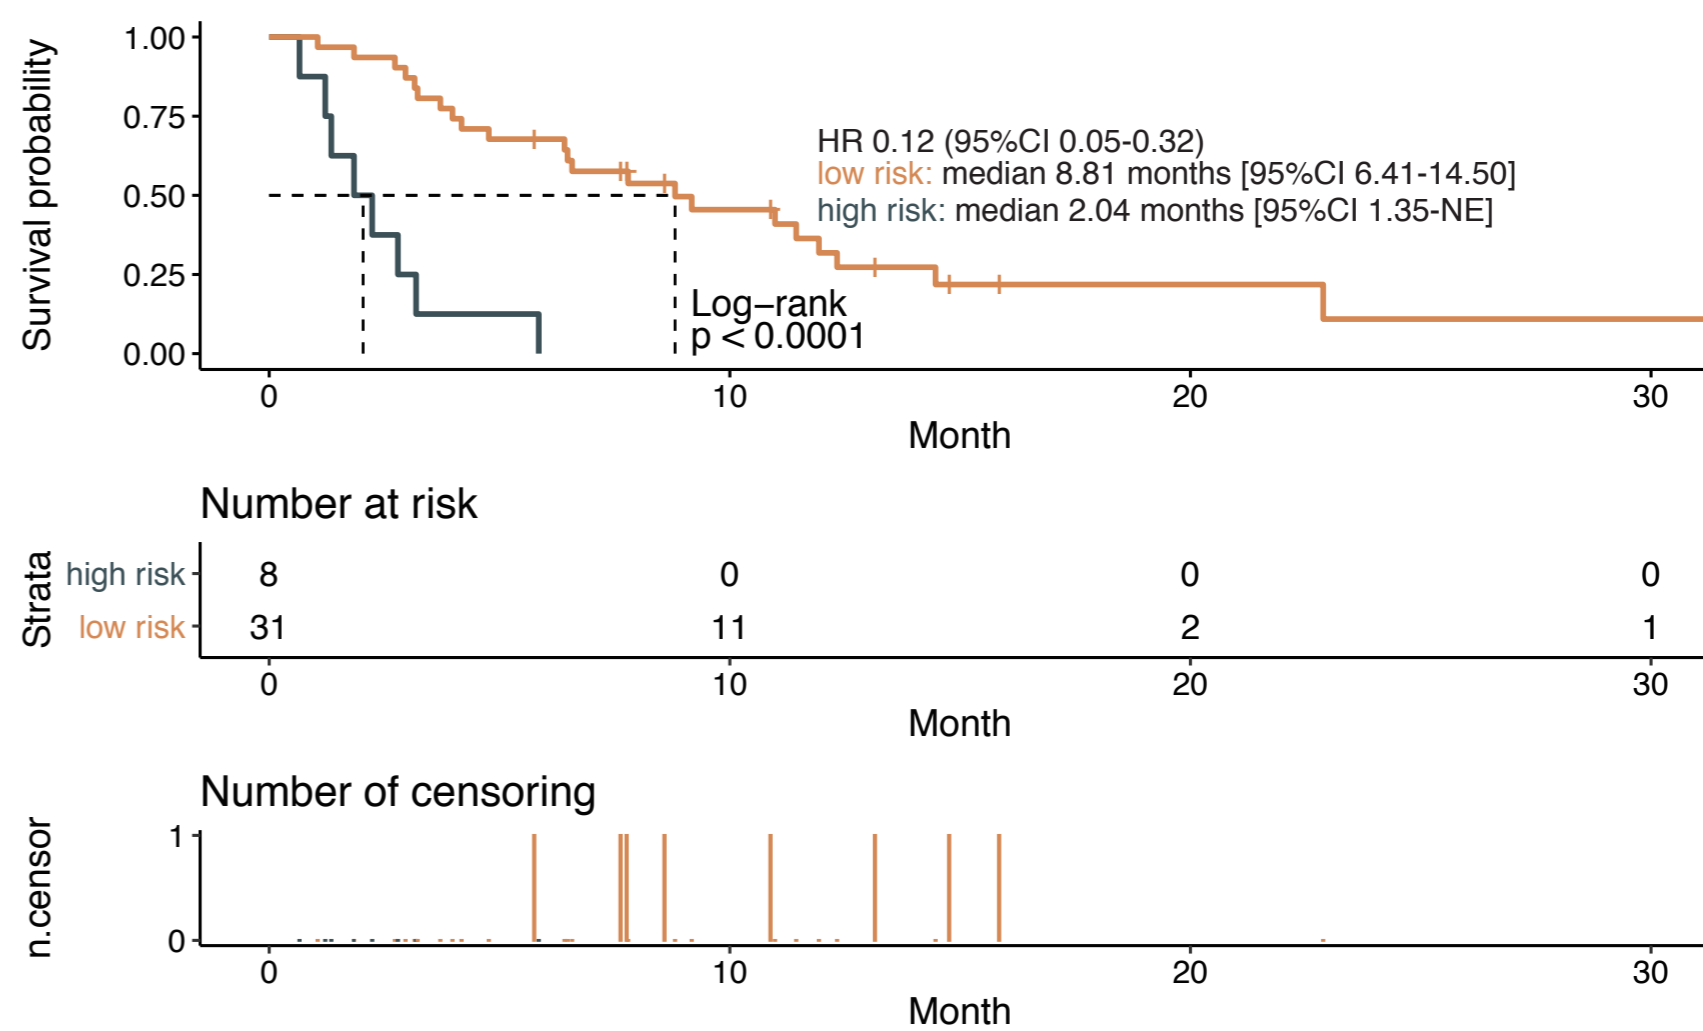

Supplement: Supplementary file [file 2020.08.03.20167163-5.pdf]
