# Supplementary material for: Prospective development and validation of a liquid immune profile-based signature (LIPS) to predict response of metastatic cancer patients to immune checkpoint inhibitors
Source: bioRxiv or medRxiv preprint supplement (doi:10.1101/2020.08.03.20167163), 2020-10-02

**A. age < 60yr OS**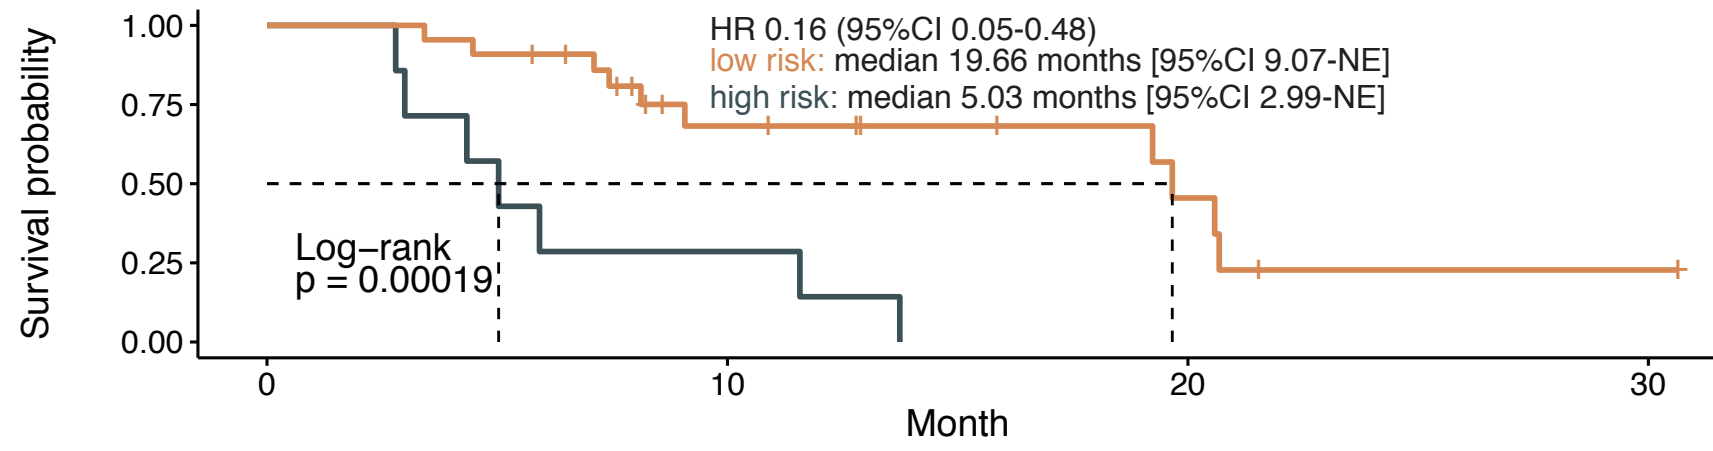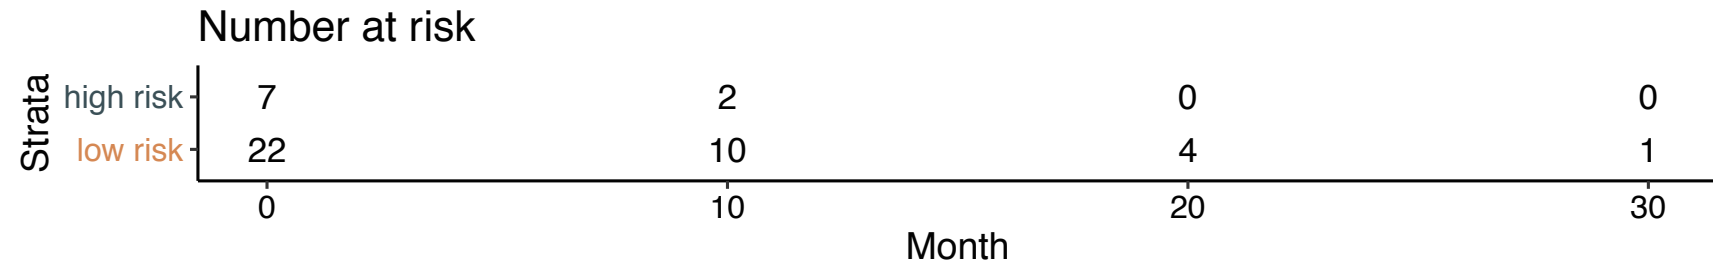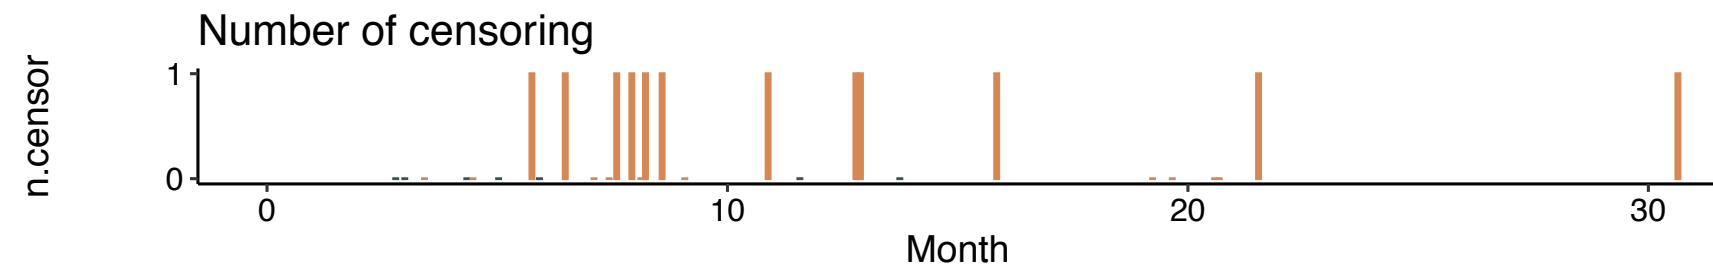**B. age ≥ 60yr OS**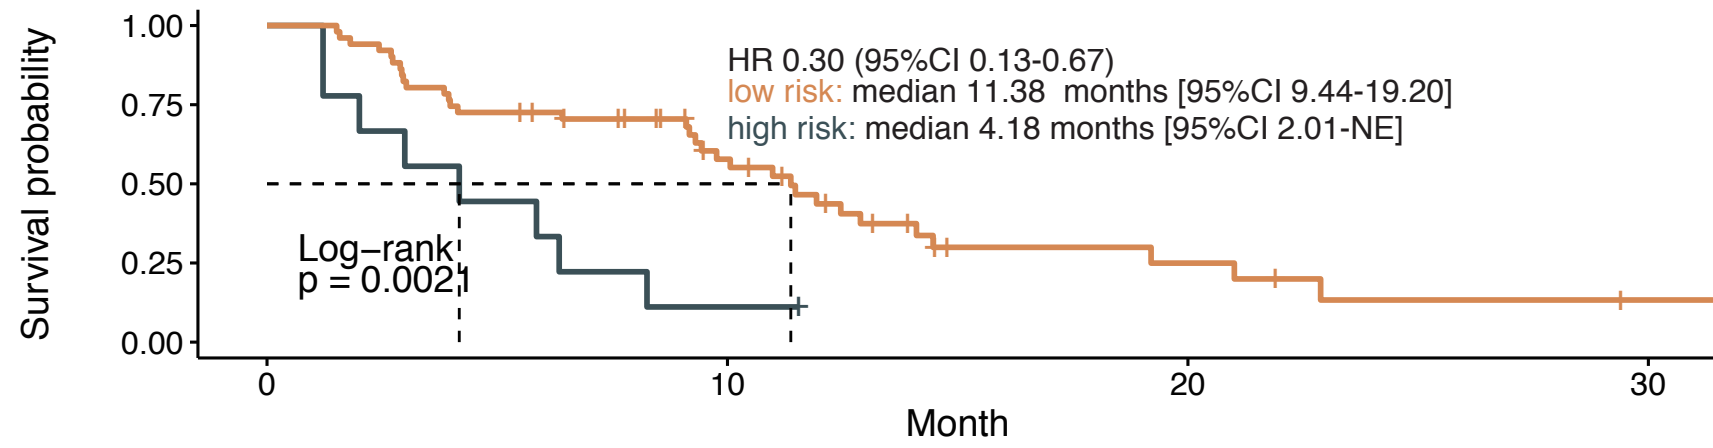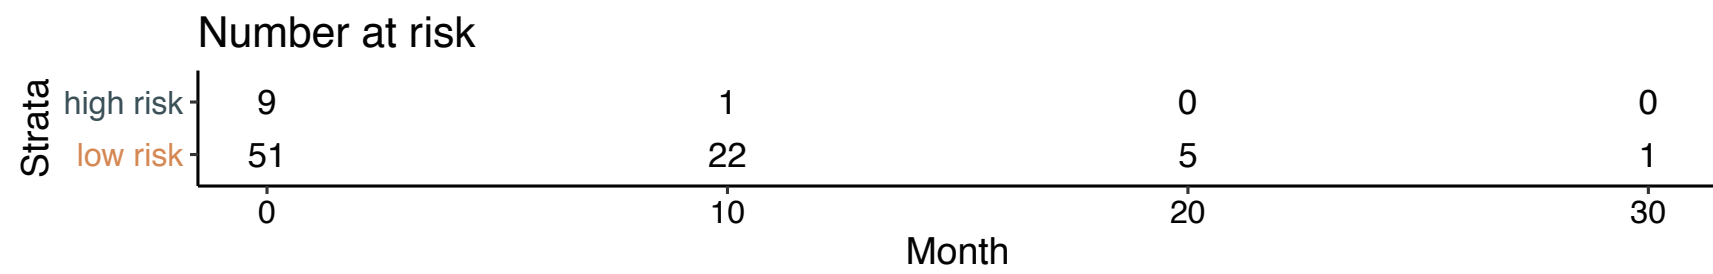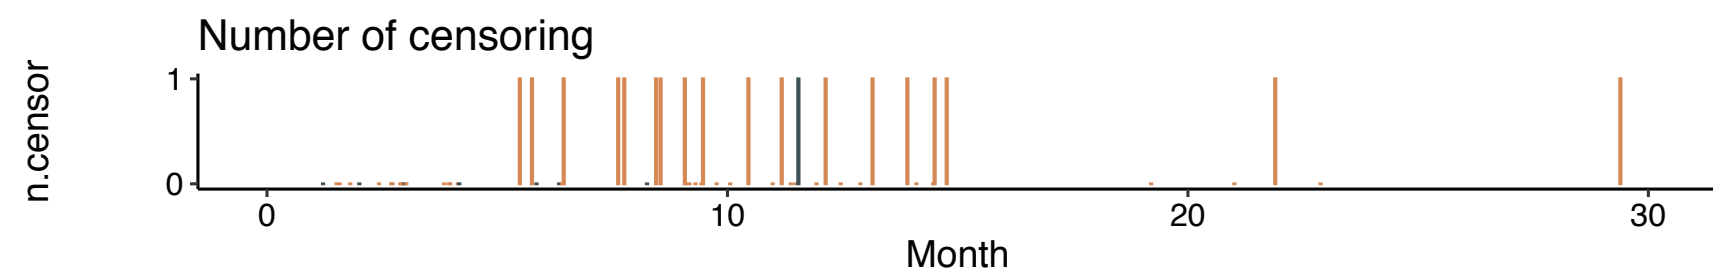**C. age < 60yr PFS**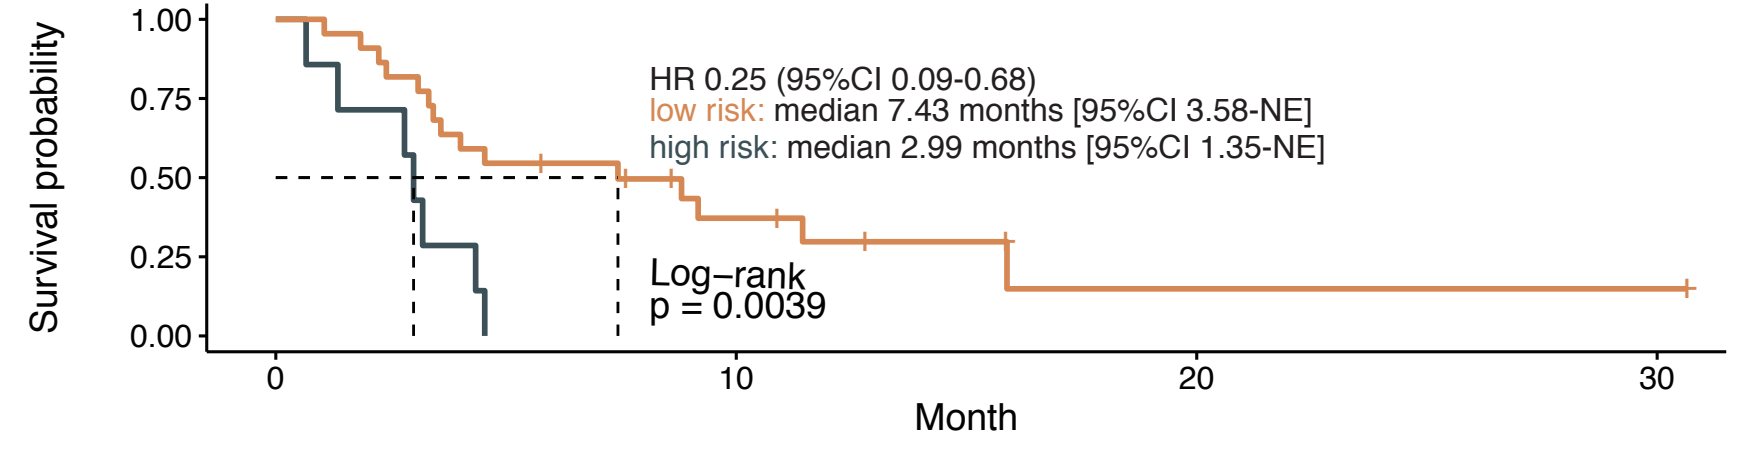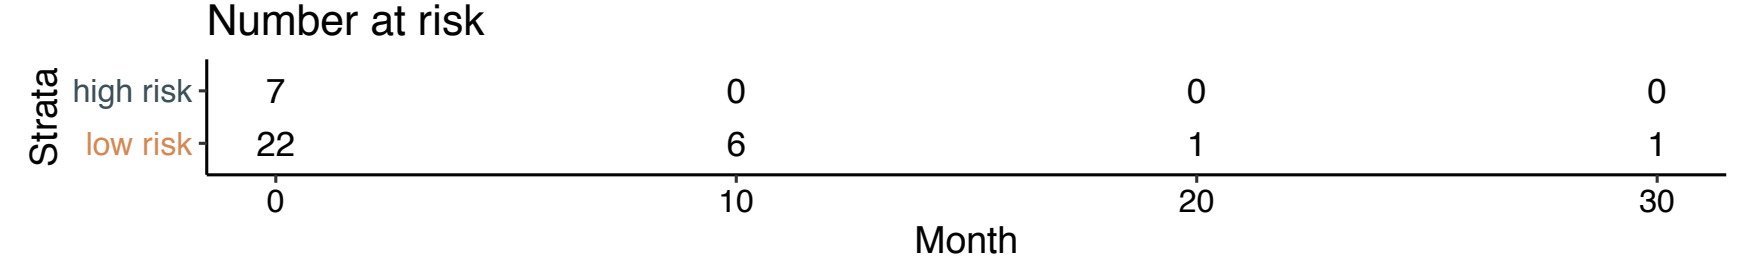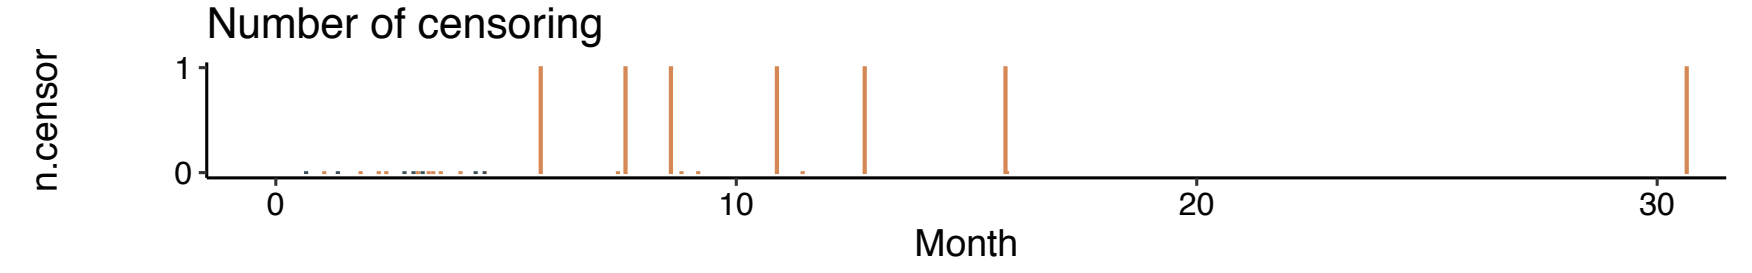**D. age ≥ 60yr PFS**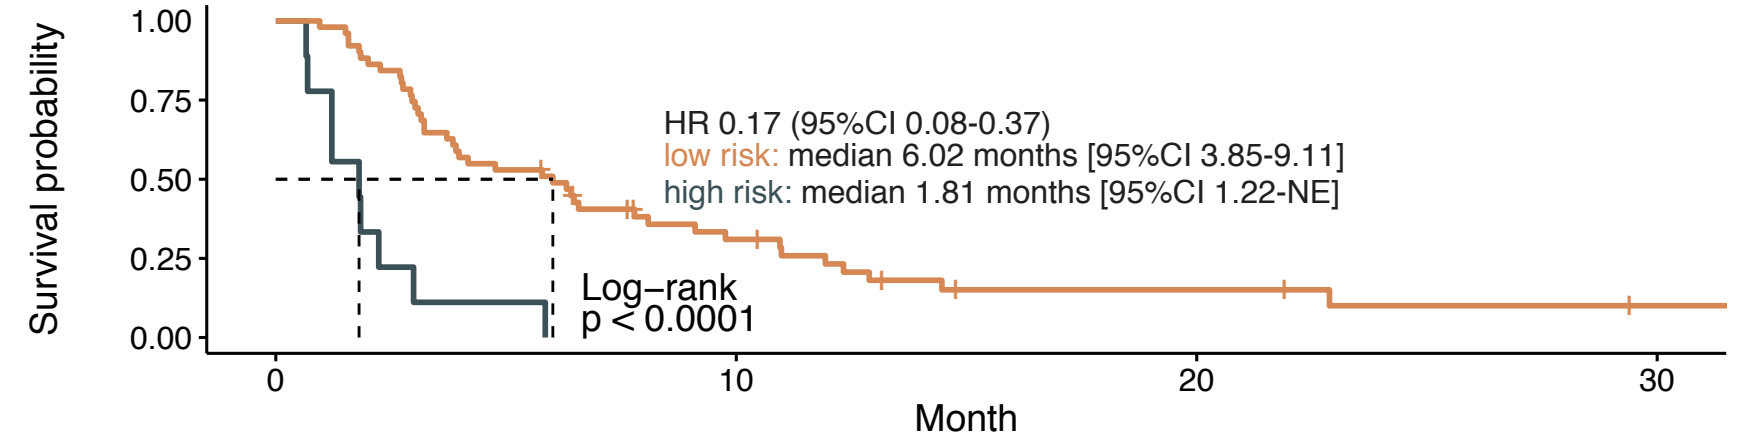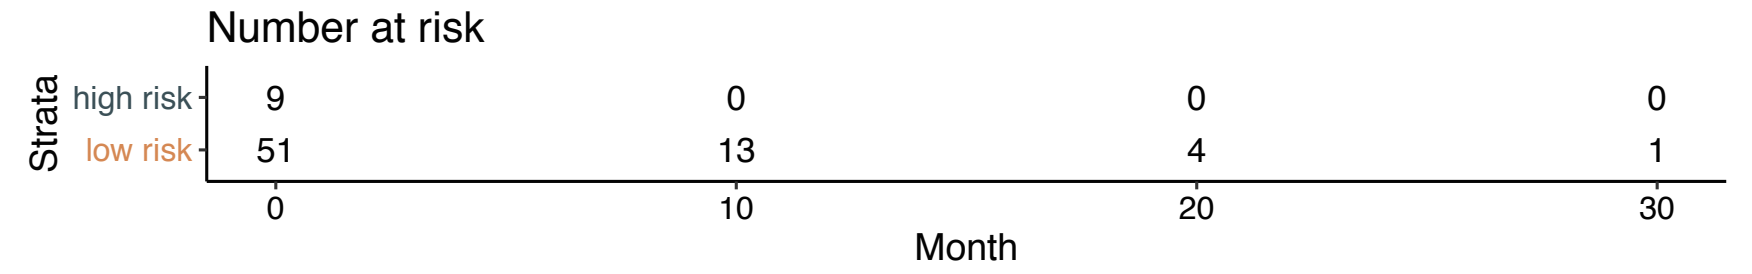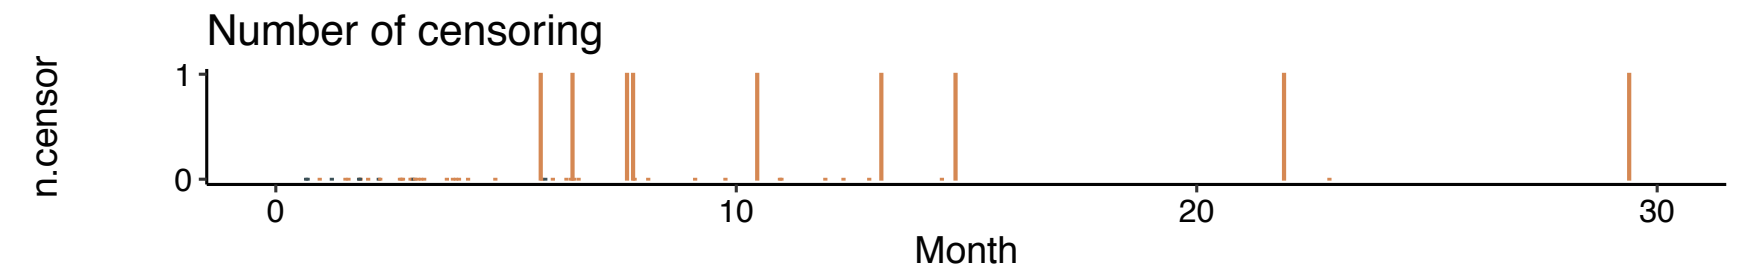

Supplement: Supplementary file [file 2020.08.03.20167163-8.pdf]
